# Supplementary material
Source: PubMed Central journal article supplement (PMC4816119)

Figure S1

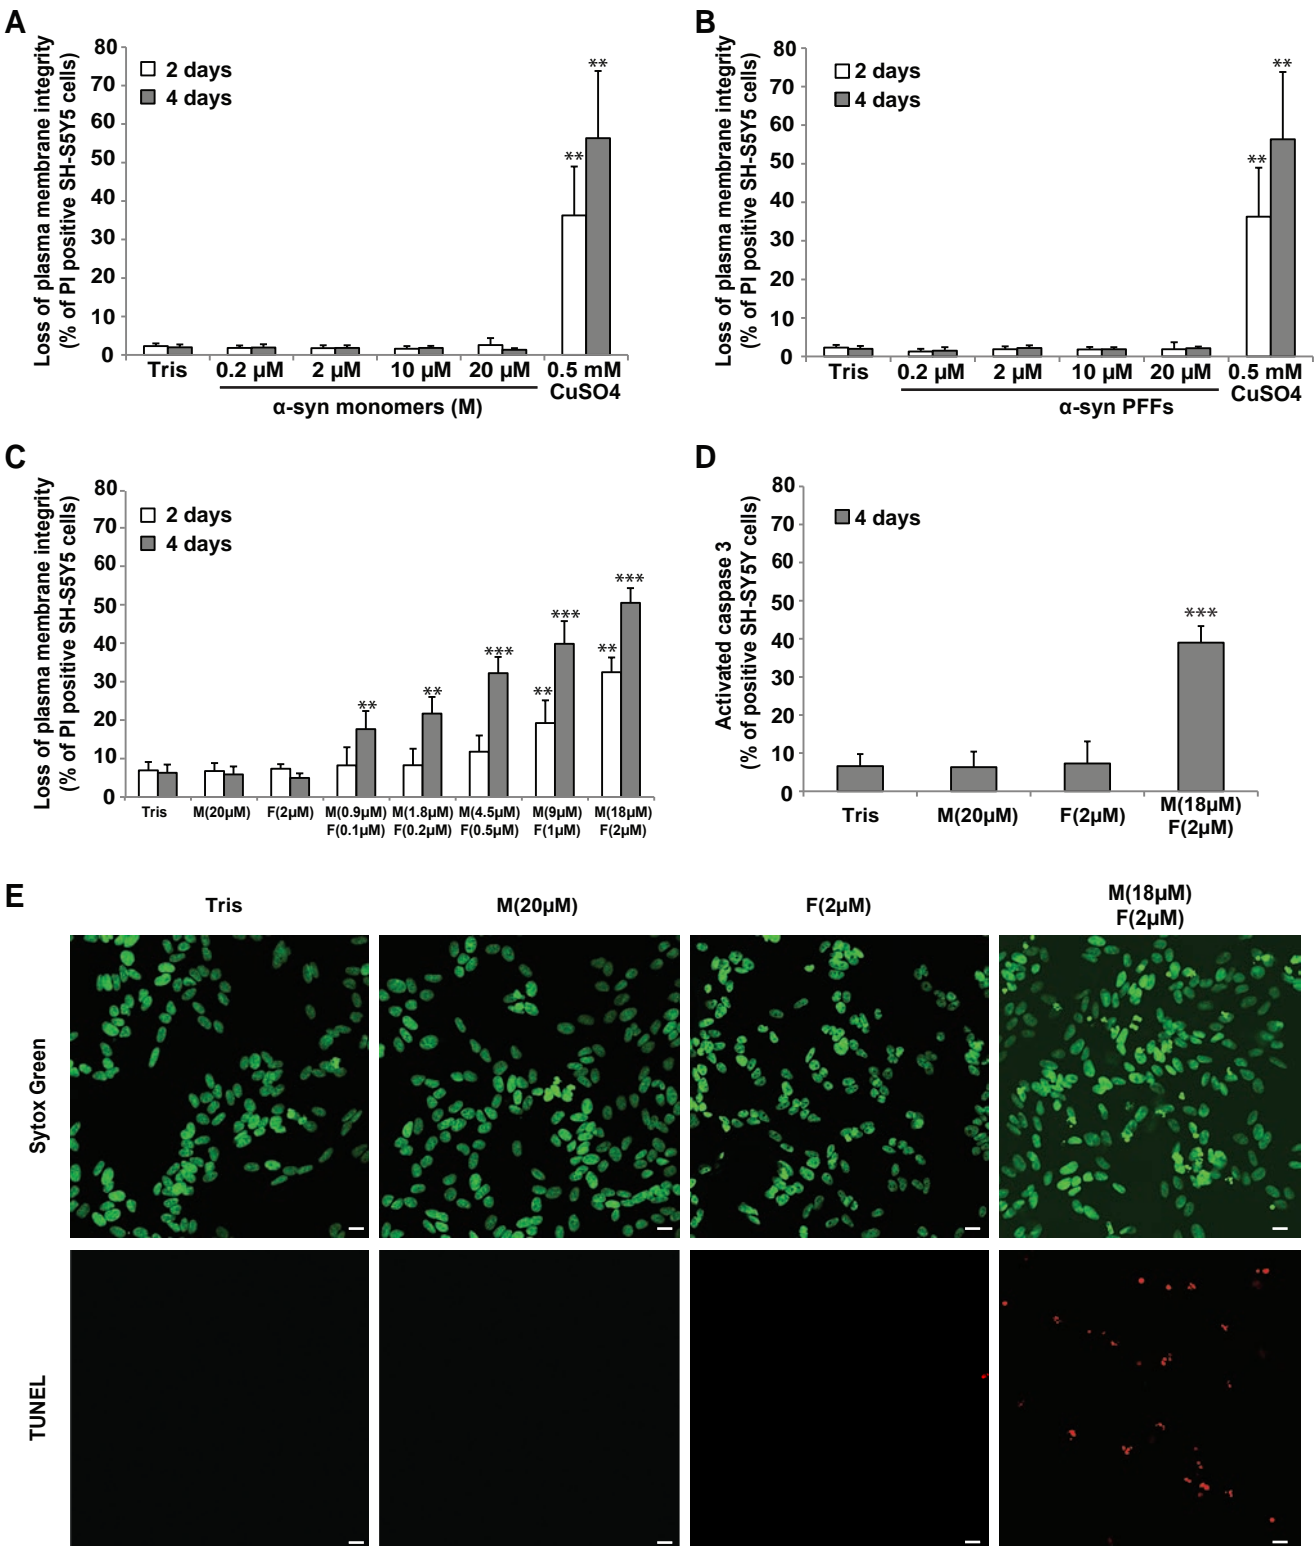

**Figure S2**

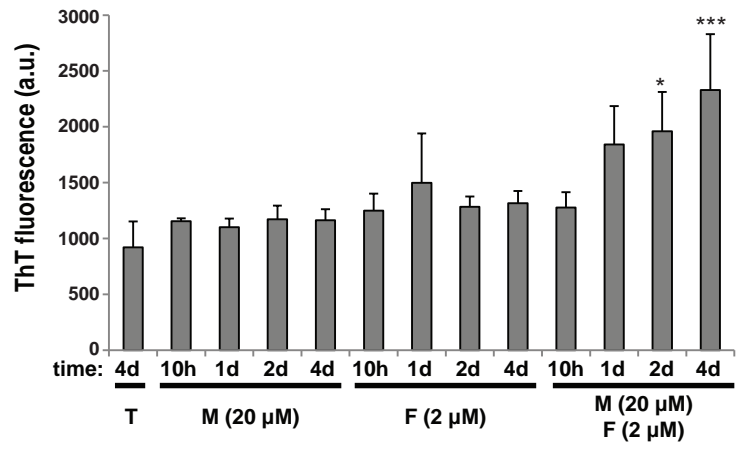

Figure S3

A

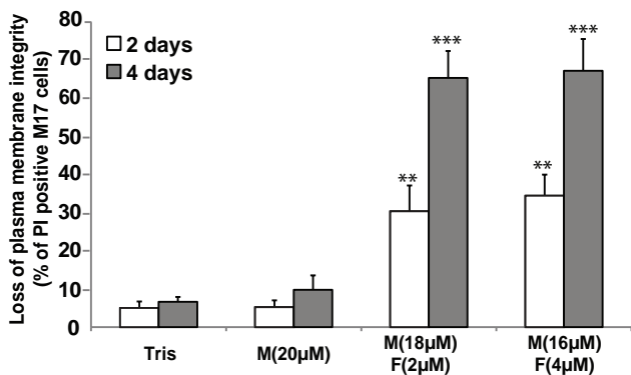

B

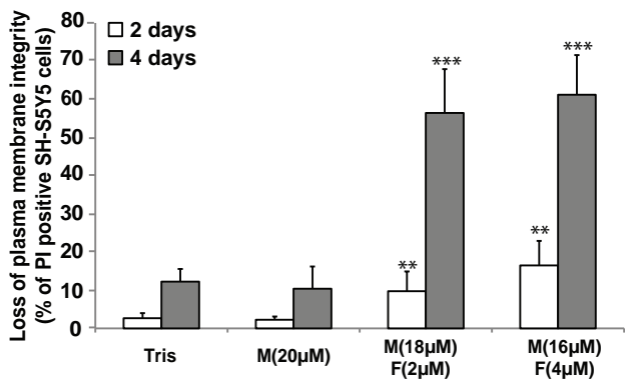

Figure S4

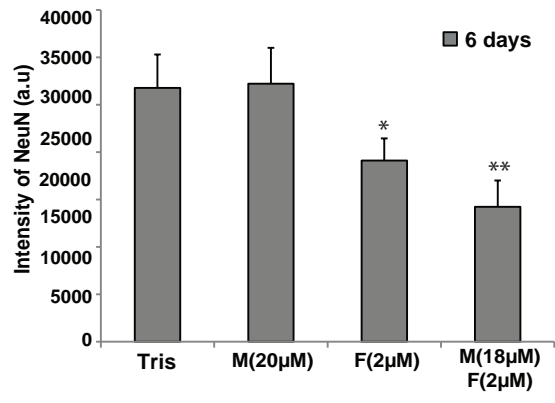

Figure S5

**A**

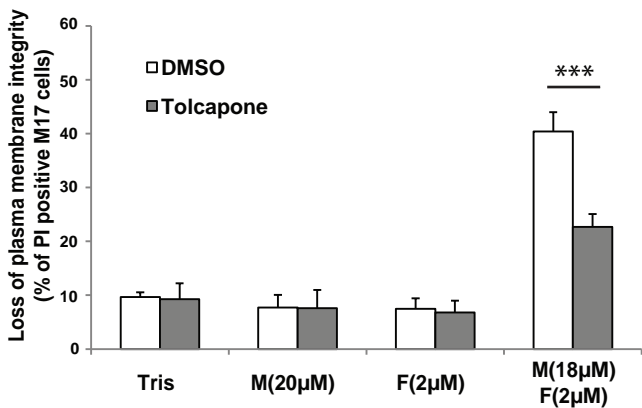

**B**

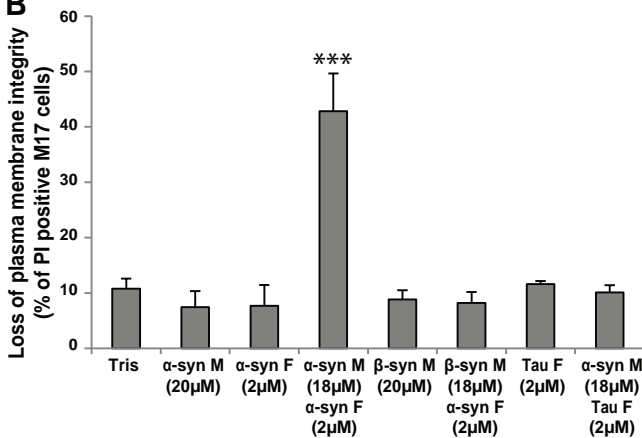

**Figure S6**

**A**

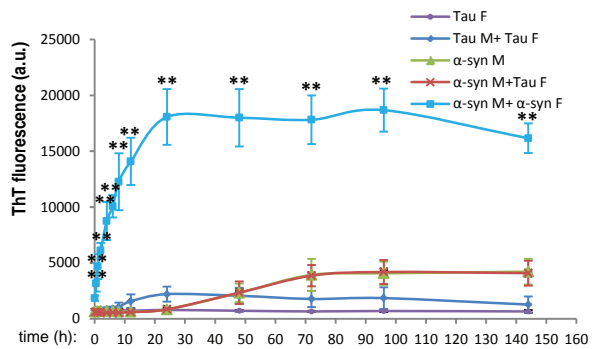

**B**

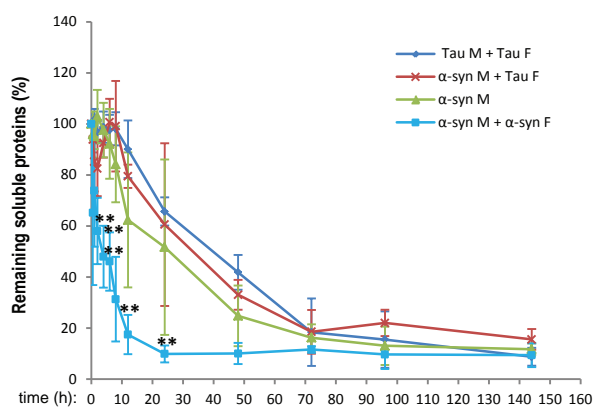

**C**

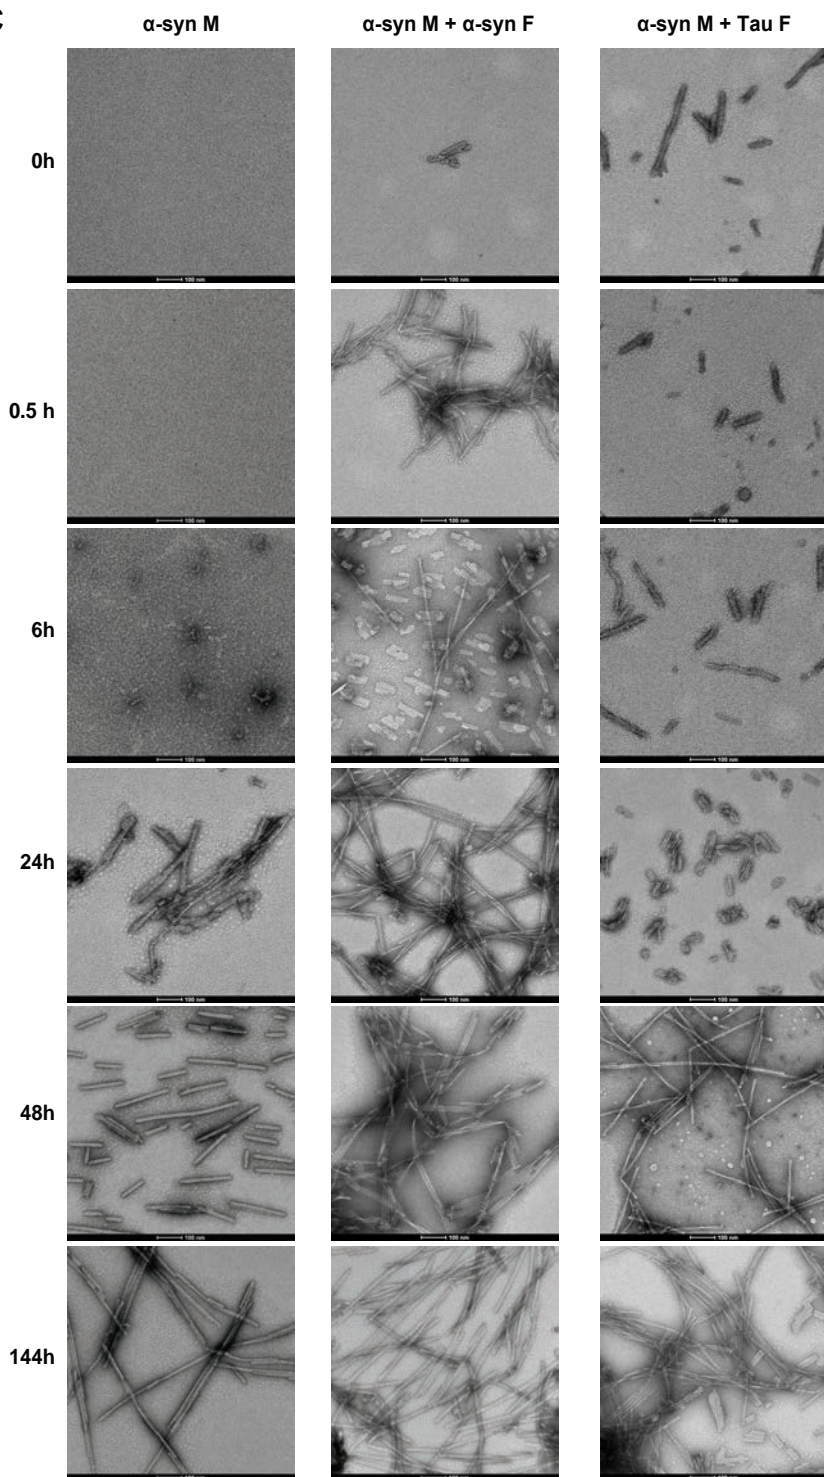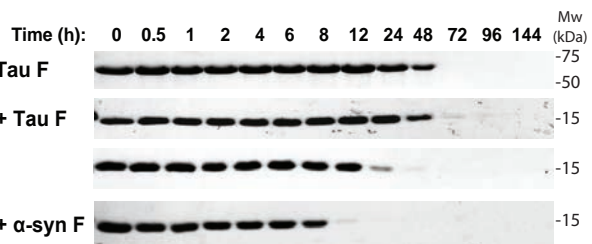

**Figure S7**

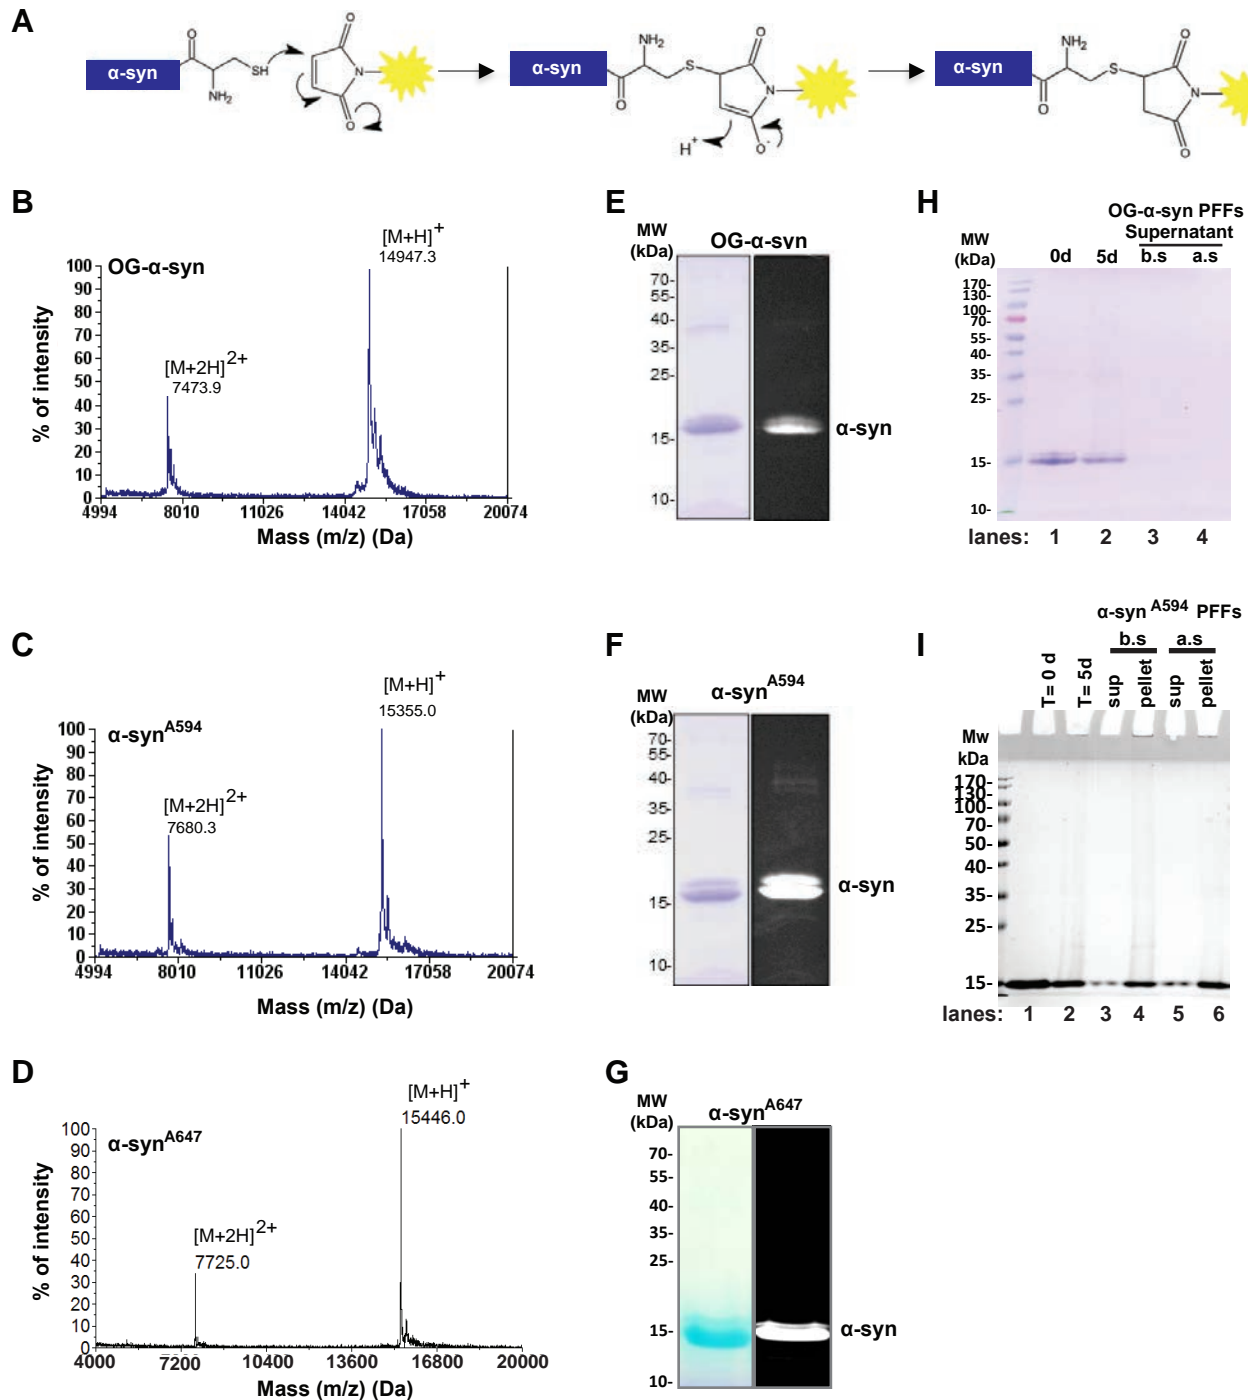

Figure S8

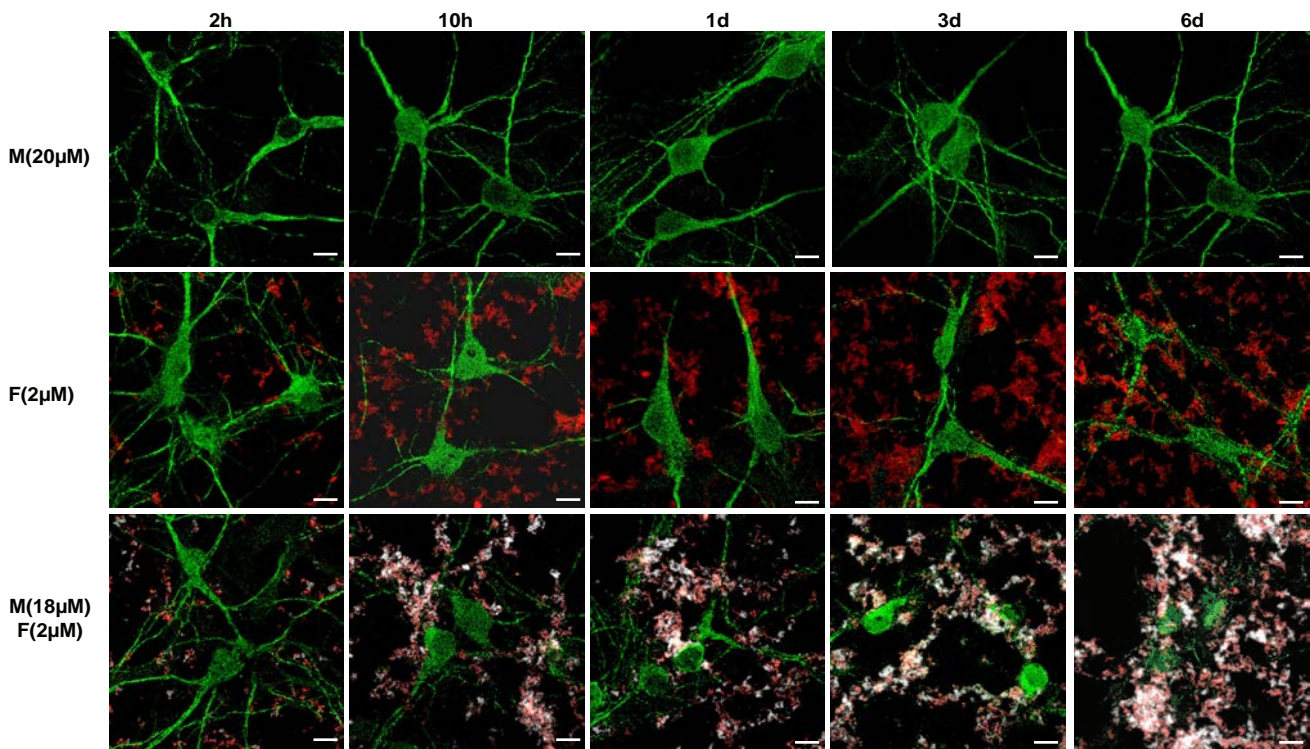



**Figure S9**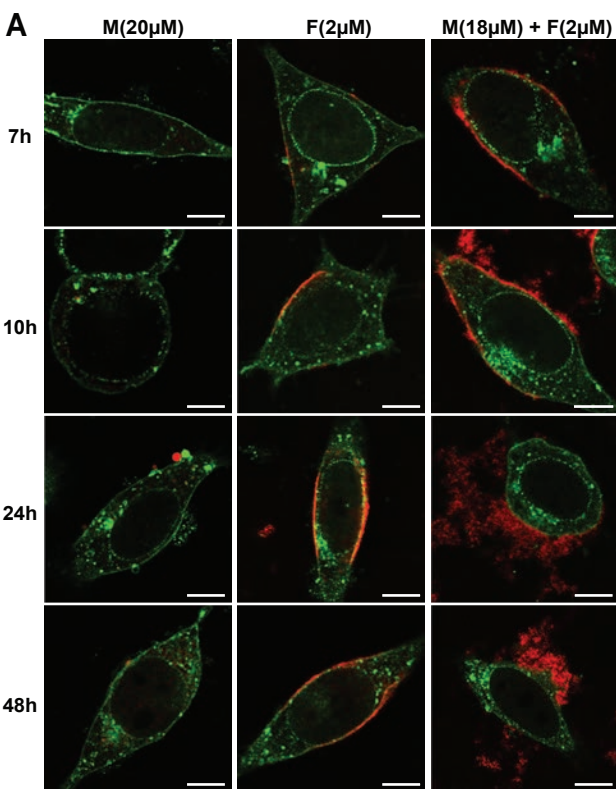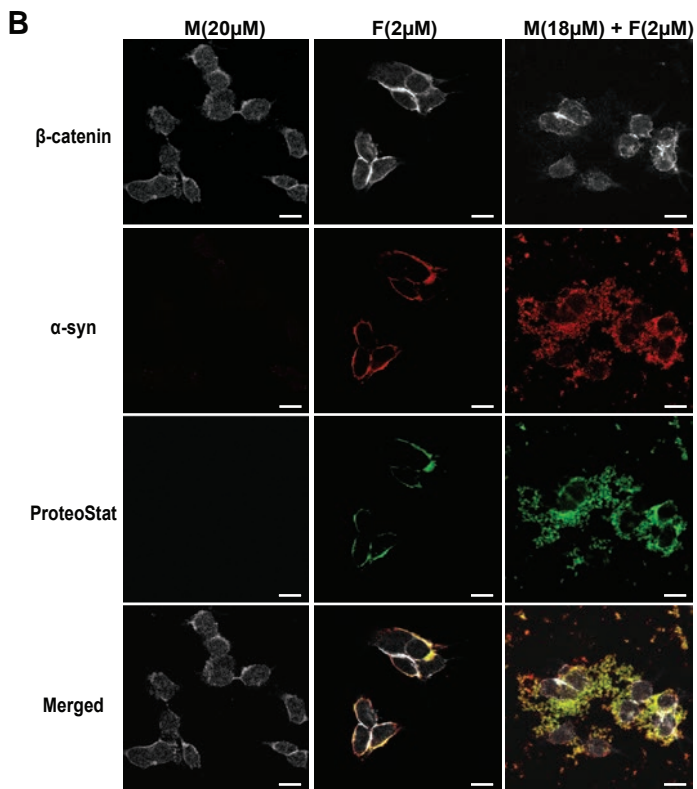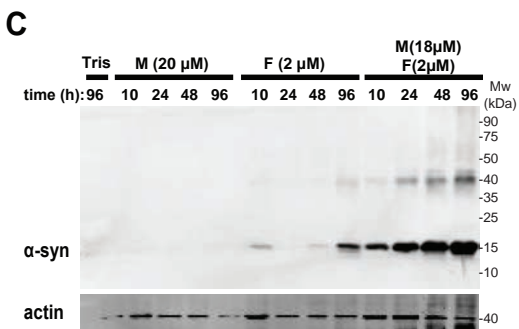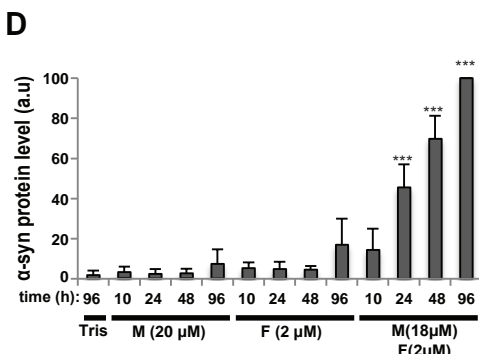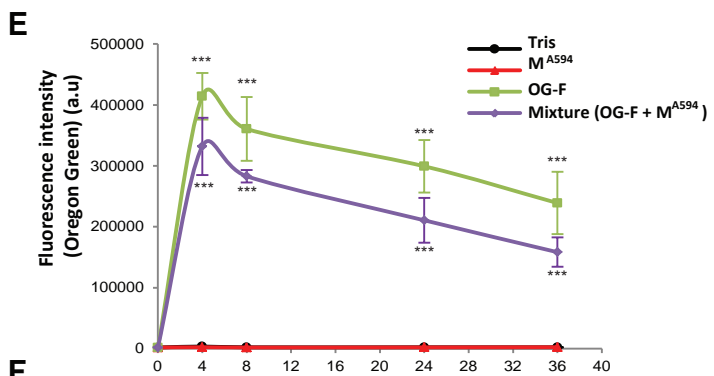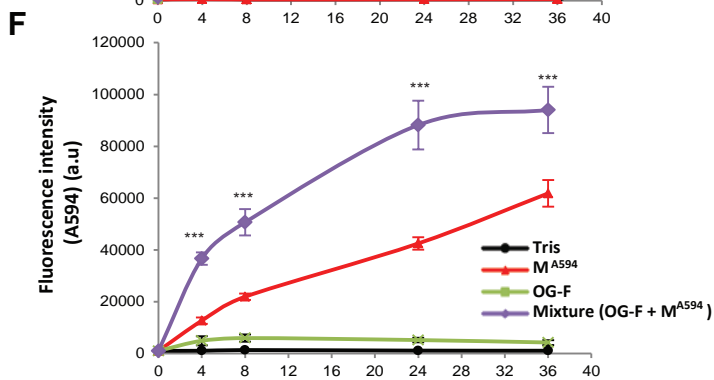

# Figure S10

A

Confocal microscopy imaging (1)

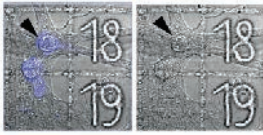

neuron 1 coordinates:  
square C position 18K

Processing for EM and resin embedding (2)

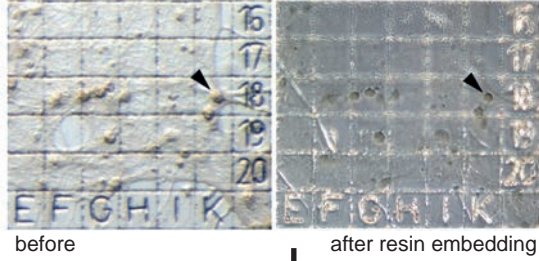

Marking cell position on the resin block surface and  
trimming the cutting face (3)

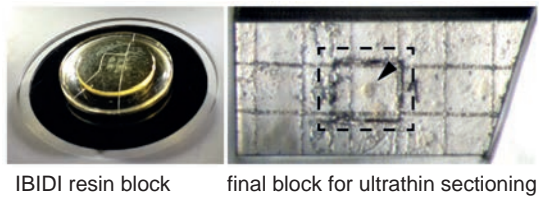

TEM imaging (4)

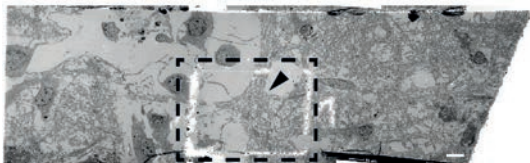

low-magnification overview image

B

Tris

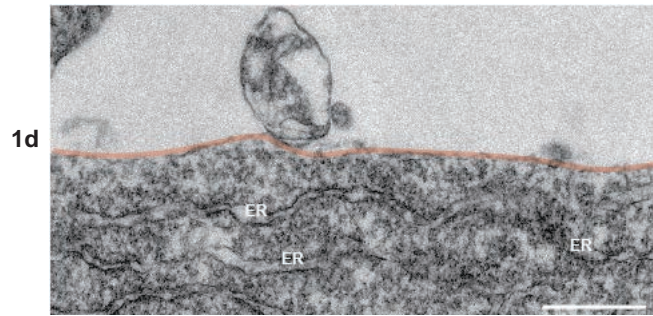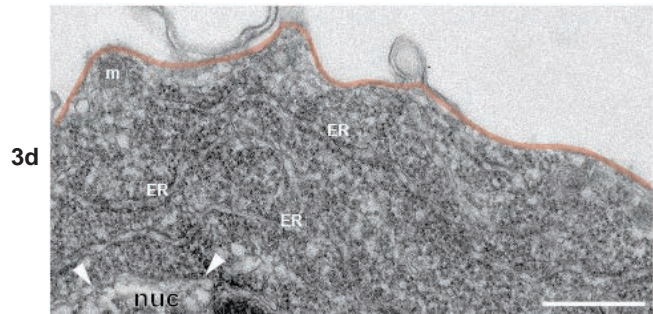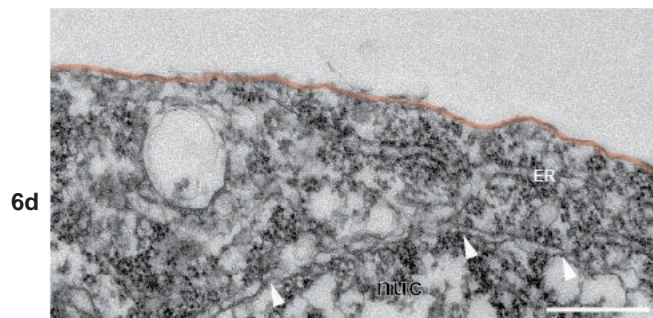

**Figure S11**

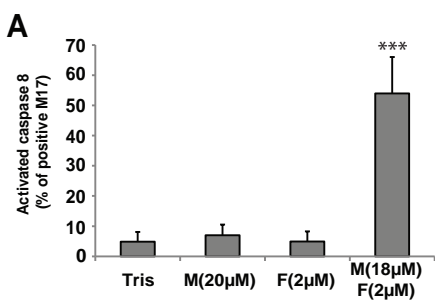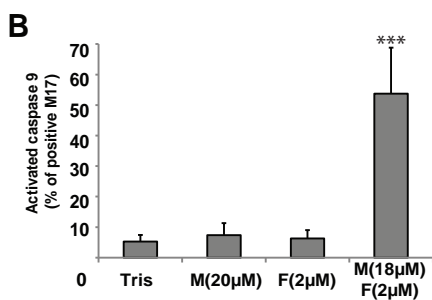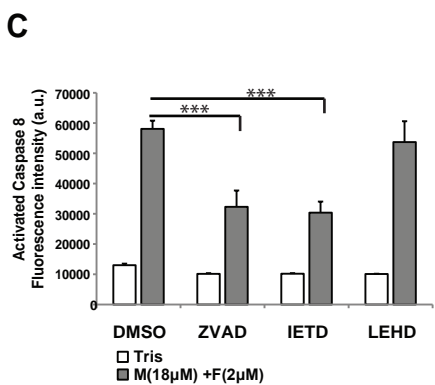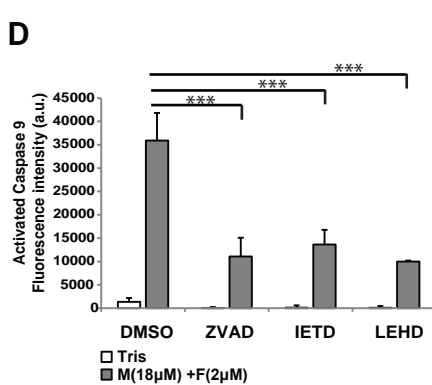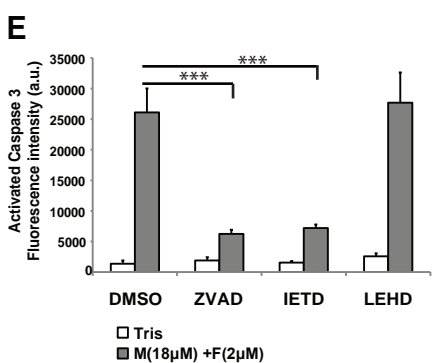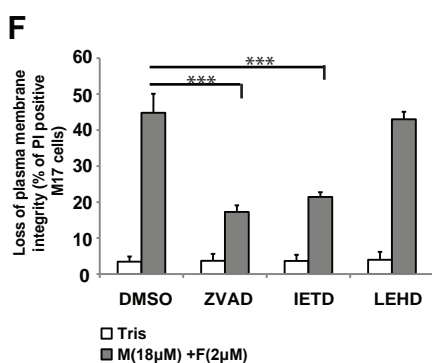

Figure S12

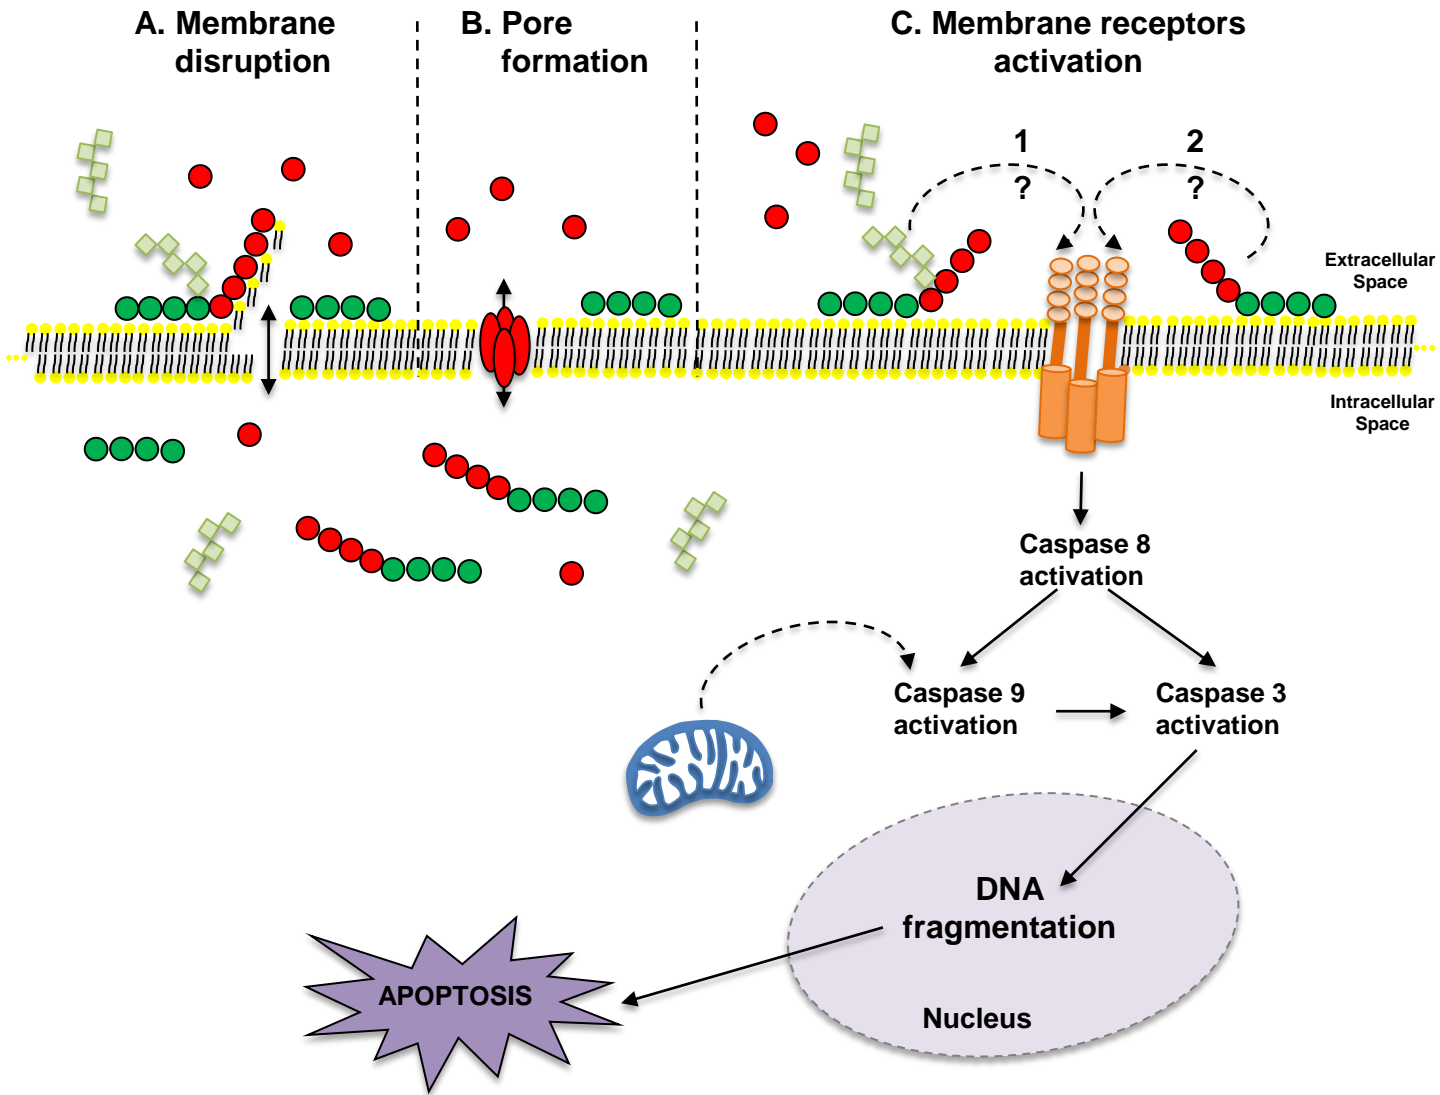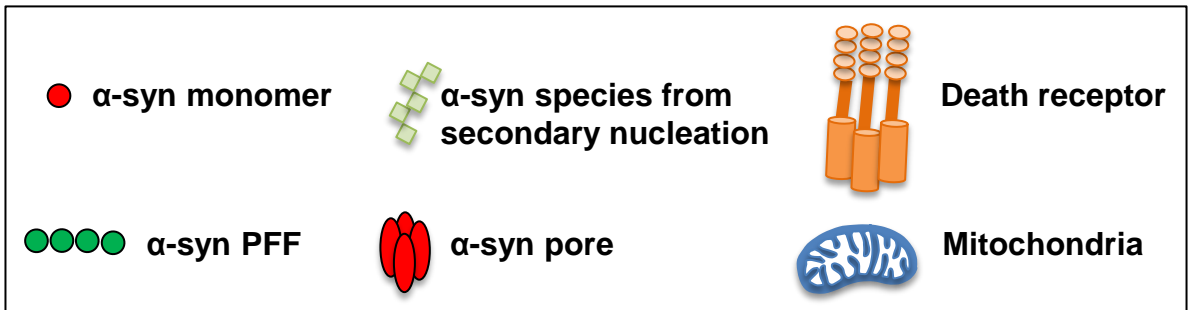

Supplement: cdd201579x2.pdf [file cdd201579x2.pdf]
